# Supplementary material for: Adaptation of Saccharomyces Species to High-Iron Conditions
Source: MDPI journal article supplement (doi:10.3390/ijms232213965), 2022-11-12
Supplement: s1 [file s1]

**Table S3.** Summary of the results obtained in this work.

| Species <sup>a</sup> | NIC (mM)  | MIC (mM)      | ΔMIC-NIC (mM) | Growth in iron<br>(solid medium) <sup>b</sup> | Iron content<br>(mg Fe/g d.w.) <sup>d</sup> | CCC1 (log <sub>2</sub> FC) <sup>e</sup> | GRX4 (log <sub>2</sub> FC) | TYW1 (log <sub>2</sub> FC) | TRX2(log <sub>2</sub> FC) | FET4 (log <sub>2</sub> FC) |
|----------------------|-----------|---------------|---------------|-----------------------------------------------|---------------------------------------------|-----------------------------------------|----------------------------|----------------------------|---------------------------|----------------------------|
| Sc1                  | 3.7 ± 0.3 | 11.2 ± 2.2    | 7.5           | =                                             | 1.8 ± 0.3                                   | 3.3                                     | 2.4                        | 2.1                        | 2.0                       | -2.7                       |
| Sc2                  | 5.9 ± 0.0 | 9.9 ± 0.4     | 4.0           | ++                                            | 1.2 ± 0.3                                   | 1.9                                     | 3.4                        | 1.5                        | 1.1                       | -0.4                       |
| Sc3                  | 5.5 ± 0.4 | 10.9 ± 0.6    | 5.4           | +                                             | n.d.                                        | n.d.                                    | n.d.                       | n.d.                       | n.d.                      | n.d.                       |
| Sc4                  | 3.7 ± 0.3 | 7.6 ± 0.3     | 3.9           | +                                             | n.d.                                        | n.d.                                    | n.d.                       | n.d.                       | n.d.                      | n.d.                       |
| Sc5                  | 4.4 ± 0.1 | 6.4 ± 0.2     | 2.1           | --                                            | n.d.                                        | n.d.                                    | n.d.                       | n.d.                       | n.d.                      | n.d.                       |
| Sc6                  | 3.6 ± 0.1 | 6.5 ± 0.3     | 2.8           | ++                                            | 1.8 ± 0.3                                   | 2.8.                                    | 3.3.                       | 1.3                        | 1.4                       | 0.5                        |
| Sc7                  | 6.0 ± 0.9 | 11.6 ± 0.8    | 5.6           | --                                            | 1.2 ± 0.1                                   | 2.1                                     | 3.1                        | 1.5                        | 0.8                       | -0.9                       |
| Sc8                  | 3.5 ± 0.2 | 11.2 ± 0.2    | 7.7           | ++                                            | n.d.                                        | n.d.                                    | n.d.                       | n.d.                       | n.d.                      | n.d.                       |
| Sc9                  | 3.8 ± 0.2 | 7.5 ± 0.1     | 3.7           | n.d. <sup>c</sup>                             | 1.8 ± 0.3                                   | 2.4                                     | 2.1.                       | 2.2                        | 0.9                       | -0.4                       |
| Sp1                  | 3.6 ± 0.3 | 7.4 ± 0.6     | 3.8           | =                                             | 1.2 ± 0.5                                   | 3.2                                     | 2.6                        | 2.1                        | 0.7                       | -0.1                       |
| Sp2                  | 3.6 ± 0.1 | 6.9 ± 0.1     | 3.3           | -                                             | 1.4 ± 0.1                                   | 1.2                                     | 3.8                        | 1.1                        | -0.0                      | -1.6                       |
| Sp3                  | 4.2 ± 0.4 | 8.3 ± 0.3     | 4.1           | -                                             | 2.2 ± 0.1                                   | 2.2                                     | 3.6                        | 2.8                        | 0.2                       | 0.1                        |
| Sp4                  | 3.8 ± 0.1 | 5.5 ± 0.3     | 1.7           | --                                            | 4.5 ± 1.3                                   | 2.5                                     | 3.9                        | 2.2                        | -0.0                      | -0.2                       |
| Sj                   | 3.8 ± 0.2 | 7.6 ± 0.3     | 3.9           | -                                             | 1.5 ± 0.4                                   | 1.6                                     | 4.1                        | 1.6                        | 0.0                       | -0.5                       |
| Sm1                  | 3.9 ± 0.2 | 7.7 ± 0.1     | 3.8           | -                                             | 1.2 ± 0.2                                   | 2.2                                     | 3.5                        | 1.4                        | 0.4                       | 0.4                        |
| Sm2                  | 4.7 ± 0.3 | 8.5 ± 0.3     | 3.9           | =                                             | 2.0 ± 0.3                                   | 2.2                                     | 3.6                        | 3.3                        | 0.2                       | 0.2                        |
| Sk1                  | 3.2 ± 1.1 | 6.5 ± 2.6     | 3.4           | --                                            | 1.2 ± 0.3                                   | 2.9                                     | 3.3                        | 3.0                        | 0.8                       | -0.7                       |
| Sk2                  | 3.0 ± 0.1 | 4.9 ± 0.3     | 1.9           | --                                            | 1.8 ± 0.5                                   | 3.1                                     | 3.4                        | 2.4                        | 0.6                       | -0.5                       |
| Sk3                  | 3.2 ± 0.2 | 3.6 ± 0.1     | 0.4           | ---                                           | 7.1 ± 2.0                                   | 2.5                                     | 2.7                        | 3.5                        | 1.3                       | -0.4                       |
| Sa1                  | 4.1 ± 0.3 | 6.3 ± 0.1-0.4 | 2.2           | =                                             | 2.4 ± 0.6                                   | 2.3                                     | 3.4                        | 1.3                        | 0.6                       | 0.0                        |
| Sa2                  | 3.8 ± 0.2 | 7.2 ± 0.2     | 3.4           | --                                            | 1.2 ± 0.3                                   | 1.6                                     | 3.5                        | 0.9                        | 0.4                       | 0.3                        |
| Se1                  | 3.6 ± 0.3 | 4.7 ± 0.4     | 1.1           | --                                            | 1.5 ± 0.2                                   | 2.7                                     | 3.2                        | 2.8                        | 1.0                       | -2.5                       |
| Se2                  | 3.7 ± 0.2 | 5.0 ± 0.0     | 1.3           | +                                             | 3.4 ± 1.4                                   | 1.4                                     | 2.6                        | 2.5                        | 0.1                       | -1.3                       |
| Su1                  | 3.8 ± 0.2 | 4.9 ± 0.1     | 1.1           | --                                            | 4.0 ± 1.5                                   | 2.8                                     | 0.0                        | 1.6                        | 0.7                       | -0.2                       |
| Su2                  | 4.1 ± 0.1 | 5.0 ± 0.0     | 0.9           | -                                             | 4.8 ± 0.9                                   | 1.5                                     | 2.2                        | 1.0                        | 0.4                       | -0.8                       |
| Su3                  | 3.9 ± 0.3 | 5.1 ± 0.3     | 1.3           | --                                            | 3.5 ± 1.0                                   | 1.5                                     | 3.0                        | 1.8                        | 0.6                       | 0.0                        |
| Su4                  | 3.2 ± 0.1 | 4.4 ± 0.4     | 1.2           | -                                             | 2.7 ± 0.6                                   | 1.0                                     | 3.0                        | 1.9                        | 0.4                       | -2.7                       |
| Su5                  | 3.5 ± 0.0 | 3.9 ± 0.2     | 0.4           | ---                                           | 2.2 ± 0.7                                   | 1.2                                     | 2.4                        | 2.0                        | 0.8                       | -1.0                       |

<sup>a</sup> Names are abbreviated as in Table 1

<sup>b</sup> Growth compared to that of Sc1, used as a control: =, similar; + and ++, levels of increased growth, -- and ---, levels of decreased growth

<sup>c</sup> n.d., not determined

<sup>d</sup> d.w., dry weight

<sup>e</sup> FC, fold change of expression
